# Supplementary material
Source: publisher site journal article supplement (https://www.dovepress.com/article/229055)
Supplement: Supplementary file 1 [file get_supplementary_file.php]

DEP domain-containing protein 1B (DEPDC1B) promotes migration and invasion in pancreatic cancer through the Rac1/PAK1-LIMK1-cofilin1 signaling pathway

Shan Zhang1, 2, #, Weiwei Shi1, 2, #, Wei Hu3, 4, #, Ding Ma1, 2, Dongliang Yan4, Kuanyong Yu4, Guang Zhang1, 2, 4, Yin Cao1, 2, 4, Junhua Wu2, Chunping Jiang1, 2, 4, *, Zhongxia Wang1, 2, 4, *.

1Department of Hepatobiliary Surgery, the Affiliated Drum Tower Hospital of Nanjing University Medical School, Nanjing, Jiangsu 210008, China; 2Jiangsu Key Laboratory of Molecular Medicine, Medical School, Nanjing University, Nanjing, Jiangsu 210093, China; 3Department of Hepatobiliary Surgery, Lianyungang Clinical College of Nanjing Medical University, Lianyungang, Jiangsu 222001, China; 4Department of Hepatobiliary Surgery, Drum Tower Clinical College of Nanjing Medical University, Nanjing, Jiangsu 210008, China

# These authors contributed equally to this work

* Correspondence to:

Zhongxia Wang. Address: 321 Zhongshan Road, Nanjing, Jiangsu 210008, China. Telephone: +86-15950451723. Fax: +86-25-83307115. Email:[freud_t@126.com](mailto:freud_t@126.com).

Chunping Jiang. Address: 321 Zhongshan Road, Nanjing, Jiangsu 210008, China. Telephone: +86-13851818663. Fax: +86-25-83307115. Email: chunpingjiang@163.com.

Supplemental Method

Immunofluorescence imaging

Cells grown on coverslips were fixed with 4% paraformaldehyde for 15 min at room temperature and incubated overnight with indicated primary antibodies at 4°C. After that, the cells were incubated with Alexa Fluor-conjugated secondary antibodies (Thermo Fisher Scientific, MA, USA), and the nucleus was counterstained with DAPI (Thermo Fisher Scientific, MA, USA). Fluorescence was photographed by confocal laser microscopy (FV3000, Olympus).

Supplementary Figure 1


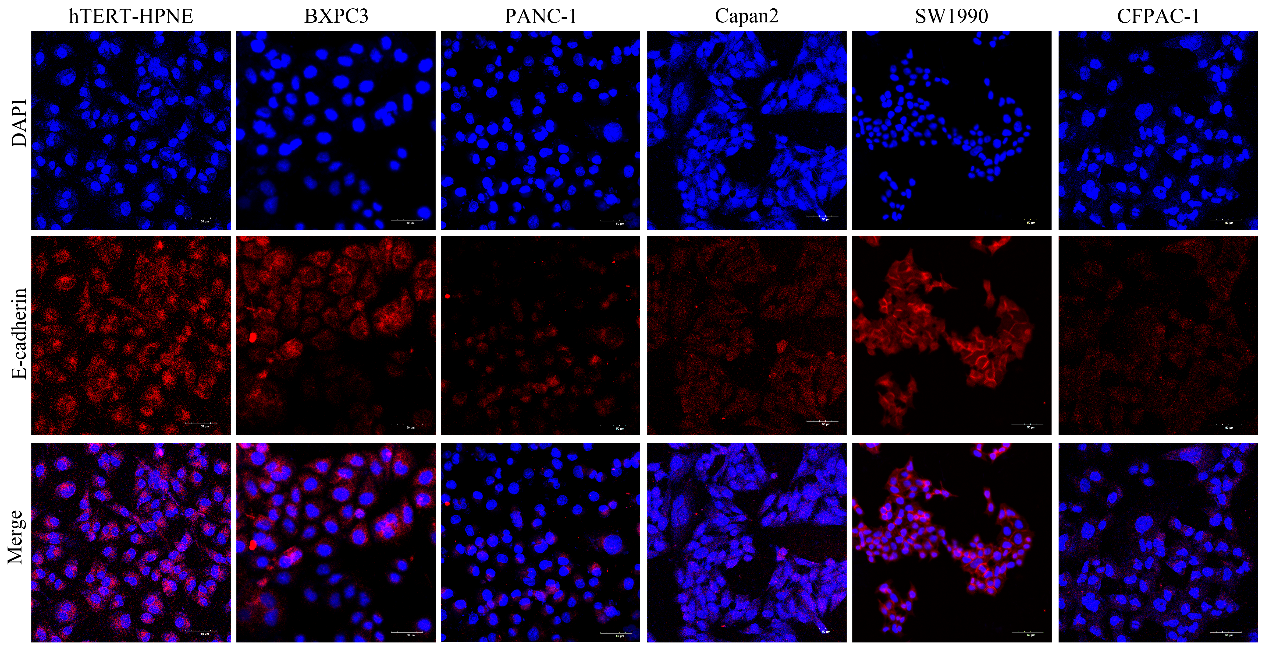


Immunofluorescence analysis for E-cadherin expression. Immunofluorescence analysis were used to observe the expression of E-cadherin in the five human PC cell lines and one normal human pancreatic ductal cell line.

Abbreviations: PC, pancreatic cancer.

Supplementary Figure 2


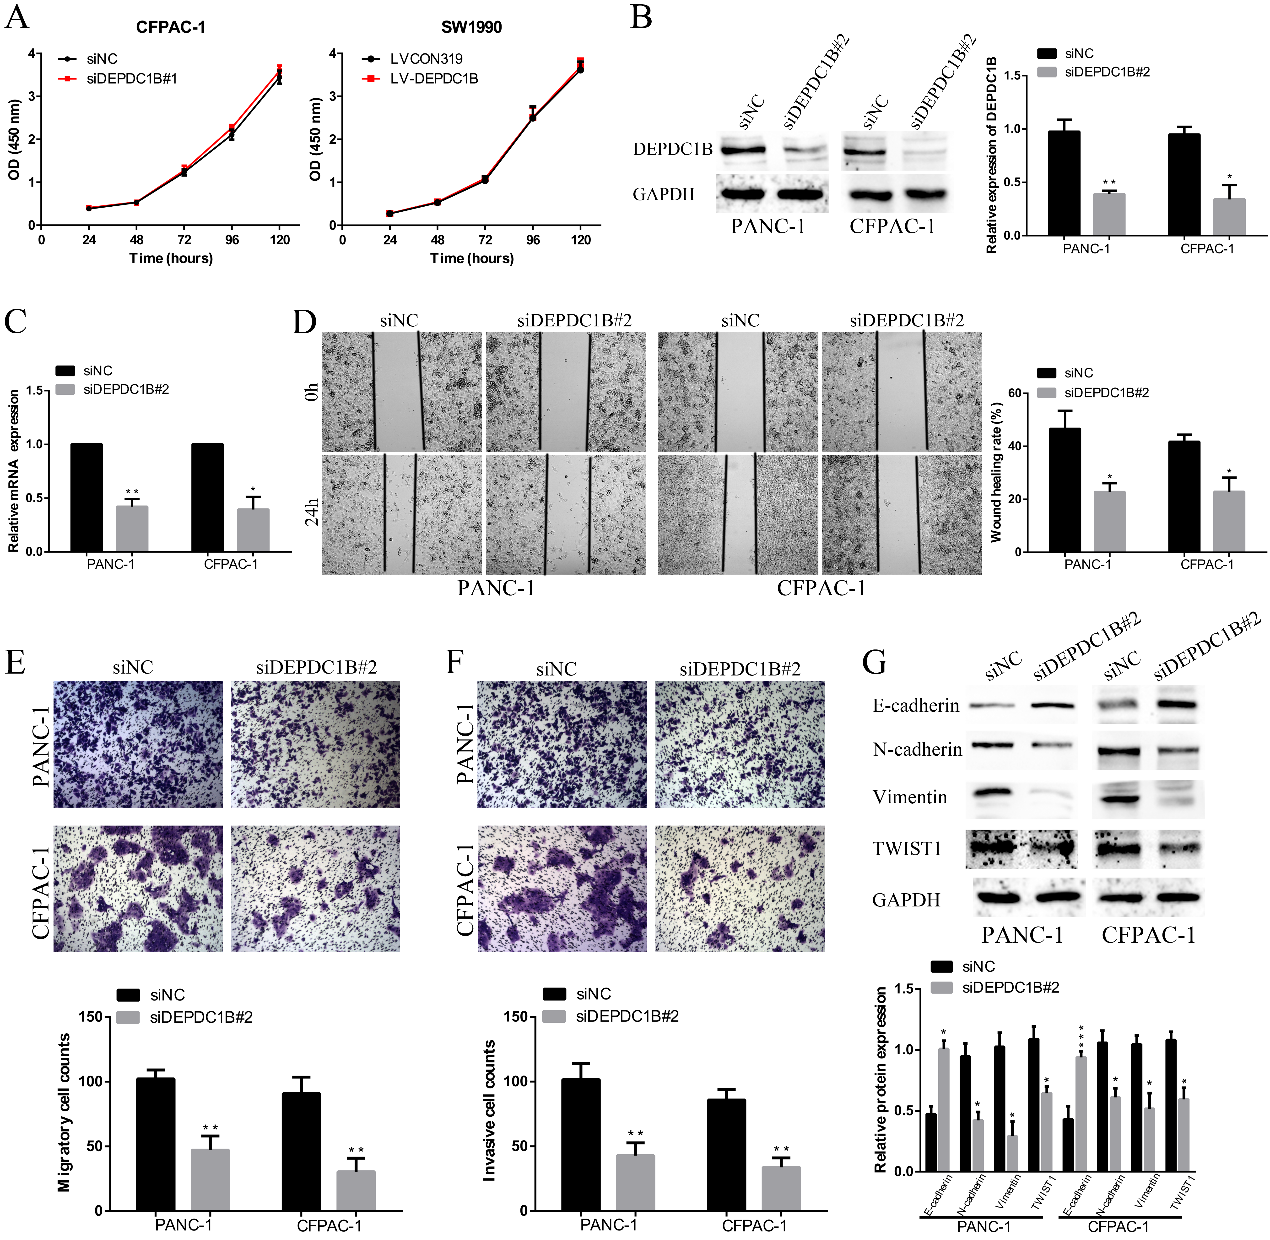


Effect of DEPDC1B knockdown on the migration and invasion of PC cells in vitro. (A) A CCK-8 assay was used to observe the effect of DEPDC1B on the cell proliferation. (B, C) The DEPDC1B interference efficiency of transient transfection with siRNAs in PC cells was examined by western blotting and qRT-PCR. (D) Typical images of the wound healing assay for the siNC and siDEPDC1B#2 groups show cell migration to the wound; the images were captured at 0 and 24 h after wounding. (E) Typical images of the transwell migration assay (without Matrigel) and (F) transwell invasion assay (with Matrigel) showing migrated and invaded cells on the membrane. The average migrated and invaded cell numbers from five random visual fields were calculated from three independent experiments. (G) EMT-related protein levels were analyzed in the siNC group and siDEPDC1B#2 group by western blotting. **P* <0.05, ***P* <0.01, and ****P* <0.001.

Abbreviations: DEPDC1B, DEP domain-containing protein 1B; EMT, epithelial-mesenchymal transition; PC, pancreatic cancer; qRT-PCR, quantitative real-time PCR.
